# Supplementary material
Source: PubMed Central journal article supplement (PMC7027367)
Supplement: NIHMS1553734-supplement-1.pdf [file NIHMS1553734-supplement-1.pdf]

## Appendix

**Table S1**  
Prevalence of exposure by subgroups of interest

|            | Victimized with a firearm,<br>N (weighted %) |
|------------|----------------------------------------------|
| Total      | 530 (9.17)                                   |
| Age        |                                              |
| 12–18      | 31 (3.40)                                    |
| 19–39      | 269 (10.79)                                  |
| 40–59      | 171 (9.80)                                   |
| 60+        | 59 (12.87)                                   |
| Sex        |                                              |
| Male       | 323 (11.01)                                  |
| Female     | 207 (7.20)                                   |
| Race       |                                              |
| White      | 370 (8.05)                                   |
| Black      | 125 (15.37)                                  |
| Other race | 35 (7.87)                                    |
| SES        |                                              |
| Low        | 156 (10.48)                                  |
| Medium     | 136 (9.18)                                   |
| High       | 110 (7.49)                                   |

**Table S2**  
Covariate distribution by strata

|                        | Age: 12–18     | Age: 19–39   | Age: 40–59   | Age: 60+    | Male         | Female       | White        | Black       | SES: Low     | SES: Medium  | SES: High    |
|------------------------|----------------|--------------|--------------|-------------|--------------|--------------|--------------|-------------|--------------|--------------|--------------|
| Covariates             | N (weighted %) |              |              |             |              |              |              |             |              |              |              |
| Age: 12–18             | 952 (100)      | —            | —            | —           | 524 (21.78)  | 428 (18.44)  | 744 (19.78)  | 144 (22.91) | 280 (17.54)  | 324 (20.81)  | 348 (22.20)  |
| Age: 19–39             | —              | 2551 (100)   | —            | —           | 1219 (45.65) | 1332 (48.14) | 1975 (45.78) | 358 (48.76) | 985 (52.55)  | 877 (48.25)  | 689 (39.56)  |
| Age: 40–59             | —              | —            | 1732 (100)   | —           | 851 (25.97)  | 881 (27.33)  | 1411 (27.68) | 216 (23.88) | 521 (23.74)  | 535 (25.01)  | 676 (31.23)  |
| Age: 60+               | —              | —            | —            | 463 (100)   | 247 (6.61)   | 216 (6.10)   | 382 (6.77)   | 50 (4.45)   | 150 (6.17)   | 144 (5.93)   | 169 (7.00)   |
| Male                   | 524 (55.86)    | 1219 (50.39) | 851 (50.45)  | 247 (53.73) | 2841 (100)   | —            | 2293 (52.97) | 341 (46.36) | 870 (47.01)  | 929 (51.42)  | 1042 (56.88) |
| Female                 | 428 (44.14)    | 1332 (49.61) | 881 (49.55)  | 216 (46.27) | —            | 2857 (100)   | 2219 (47.03) | 427 (53.64) | 1066 (52.99) | 951 (48.58)  | 840 (43.12)  |
| White                  | 744 (75.68)    | 1975 (75.38) | 1411 (80.19) | 382 (82.06) | 2293 (79.01) | 2219 (75.15) | 4512 (100)   | —           | 1398 (70.02) | 1476 (76.59) | 1638 (85.04) |
| Black                  | 144 (17.63)    | 358 (16.15)  | 216 (13.91)  | 50 (10.86)  | 341 (13.91)  | 427 (17.24)  | —            | 768 (100)   | 380 (22.16)  | 257 (15.38)  | 131 (8.83)   |
| SES: low               | 280 (29.30)    | 985 (37.79)  | 521 (30.04)  | 150 (32.66) | 870 (30.62)  | 1066 (36.98) | 1398 (30.57) | 380 (48.11) | 1936 (100)   | —            | —            |
| SES: medium            | 324 (34.59)    | 877 (34.52)  | 535 (31.49)  | 144 (31.25) | 929 (33.32)  | 951 (33.73)  | 1476 (33.28) | 257 (33.23) | —            | 1880 (100)   | —            |
| SES: high              | 348 (36.11)    | 689 (27.69)  | 676 (38.47)  | 169 (36.09) | 1042 (36.06) | 840 (29.29)  | 1638 (36.15) | 131 (18.66) | —            | —            | 1882 (100)   |
| Ever separated         | 78 (8.16)      | 438 (15.62)  | 664 (38.81)  | 164 (34.99) | 553 (17.70)  | 791 (25.59)  | 1086 (22.09) | 165 (18.78) | 553 (25.75)  | 474 (22.65)  | 323 (16.02)  |
| House or apartment     | 924 (97.09)    | 2445 (96.58) | 1653 (96.27) | 444 (95.91) | 2712 (96.32) | 2754 (96.81) | 4325 (96.30) | 746 (98.11) | 1804 (94.02) | 1822 (97.20) | 1853 (98.49) |
| Other housing          | 28 (2.91)      | 99 (3.42)    | 73 (3.73)    | 18 (4.09)   | 120 (3.68)   | 98 (3.19)    | 178 (3.70)   | 18 (1.89)   | 132 (5.98)   | 58 (2.80)    | 29 (1.51)    |
| In residence < 1 year  | 230 (23.97)    | 1122 (43.80) | 378 (22.24)  | 52 (11.54)  | 804 (29.56)  | 978 (34.66)  | 1375 (31.33) | 267 (35.13) | 902 (47.57)  | 603 (32.30)  | 282 (15.66)  |
| In residence > 1 year  | 720 (76.03)    | 1422 (56.20) | 1346 (77.76) | 407 (88.46) | 2025 (70.44) | 1870 (65.34) | 3122 (68.67) | 497 (64.87) | 1034 (52.43) | 1277 (67.70) | 1600 (84.34) |
| Previous victimization | 131 (13.93)    | 478 (18.03)  | 333 (19.22)  | 110 (24.18) | 496 (17.04)  | 556 (18.84)  | 824 (17.70)  | 146 (17.99) | 449 (22.57)  | 332 (17.29)  | 271 (13.76)  |
| Victimized by stranger | 195 (22.29)    | 940 (38.87)  | 562 (33.98)  | 162 (35.75) | 1188 (43.72) | 671 (23.81)  | 1470 (34.15) | 240 (32.36) | 547 (29.19)  | 633 (34.15)  | 748 (39.74)  |

**Table S3**

Propensity score trimming:\* risk differences (RD) and ratios (RR) for severe distress and social functioning problems associated with firearm involvement during a violent victimization

| A. Severe distress             |                          |                          |
|--------------------------------|--------------------------|--------------------------|
|                                | RD (95% CI)              | RR (95% CI)              |
| Age                            |                          |                          |
| 12–18                          | 0.13 (–0.12, 0.38)       | 1.84 (0.74, 4.58)        |
| 19–39                          | <b>0.16 (0.09, 0.24)</b> | <b>1.73 (1.41, 2.13)</b> |
| 40–59                          | <b>0.19 (0.10, 0.28)</b> | <b>1.55 (1.29, 1.85)</b> |
| 60+                            | 0.05 (–0.13, 0.23)       | 1.17 (0.70, 1.97)        |
| Sex                            |                          |                          |
| Male                           | <b>0.12 (0.05, 0.19)</b> | <b>1.77 (1.36, 2.32)</b> |
| Female                         | <b>0.20 (0.11, 0.29)</b> | <b>1.57 (1.32, 1.89)</b> |
| Race                           |                          |                          |
| White                          | <b>0.15 (0.09, 0.21)</b> | <b>1.63 (1.38, 1.93)</b> |
| Black                          | <b>0.14 (0.00, 0.28)</b> | <b>1.42 (1.05, 1.93)</b> |
| SES                            |                          |                          |
| Low                            | <b>0.13 (0.03, 0.22)</b> | <b>1.40 (1.13, 1.73)</b> |
| Medium                         | <b>0.12 (0.03, 0.21)</b> | <b>1.50 (1.15, 1.95)</b> |
| High                           | <b>0.20 (0.10, 0.30)</b> | <b>2.12 (1.60, 2.82)</b> |
| B. Social functioning problems |                          |                          |
| Age                            |                          |                          |
| 12–18                          | –0.12 (–0.33, 0.10)      | 0.60 (0.18, 2.04)        |
| 19–39                          | 0.07 (–0.00, 0.15)       | <b>1.30 (1.03, 1.64)</b> |
| 40–59                          | 0.04 (–0.05, 0.13)       | 1.14 (0.86, 1.51)        |
| 60+                            | 0.04 (–0.14, 0.21)       | 1.19 (0.55, 2.57)        |
| Sex                            |                          |                          |
| Male                           | 0.05 (–0.02, 0.12)       | 1.27 (0.94, 1.71)        |
| Female                         | 0.06 (–0.03, 0.16)       | 1.19 (0.94, 1.51)        |
| Race                           |                          |                          |
| White                          | 0.02 (–0.04, 0.08)       | 1.09 (0.87, 1.36)        |
| Black                          | 0.08 (–0.04, 0.21)       | 1.31 (0.90, 1.91)        |
| SES                            |                          |                          |
| Low                            | <b>0.14 (0.05, 0.24)</b> | <b>1.51 (1.20, 1.91)</b> |
| Medium                         | –0.01 (–0.10, 0.08)      | 0.97 (0.70, 1.35)        |
| High                           | 0.09 (–0.01, 0.20)       | <b>1.48 (1.01, 2.14)</b> |

Bolded text indicates statistical significant at  $P < .05$ .

\* Observations with propensity scores below the fifth percentile of the exposed and above the 95th percentile of the unexposed were dropped. Analyses were on a single imputed data set.

**Table S4**

Sampling factors:\* risk differences (RD) and ratios (RR) for severe distress and social functioning problems associated with firearm involvement during a violent victimization

| A. Severe distress             |                          |                          |
|--------------------------------|--------------------------|--------------------------|
|                                | RD (95% CI)              | RR (95% CI)              |
| Age                            |                          |                          |
| 12–18                          | 0.02 (–0.16, 0.20)       | 1.14 (0.39, 3.31)        |
| 19–39                          | <b>0.18 (0.10, 0.26)</b> | <b>1.79 (1.46, 2.19)</b> |
| 40–59                          | <b>0.18 (0.09, 0.27)</b> | <b>1.54 (1.28, 1.86)</b> |
| 60+                            | –0.00 (–0.20, 0.19)      | 0.99 (0.52, 1.88)        |
| Sex                            |                          |                          |
| Male                           | <b>0.14 (0.07, 0.21)</b> | <b>1.90 (1.48, 2.45)</b> |
| Female                         | <b>0.18 (0.09, 0.28)</b> | <b>1.53 (1.27, 1.85)</b> |
| Race                           |                          |                          |
| White                          | <b>0.14 (0.08, 0.20)</b> | <b>1.62 (1.37, 1.92)</b> |
| Black                          | <b>0.17 (0.03, 0.31)</b> | <b>1.59 (1.16, 2.17)</b> |
| SES                            |                          |                          |
| Low                            | <b>0.14 (0.04, 0.23)</b> | <b>1.43 (1.16, 1.77)</b> |
| Medium                         | <b>0.17 (0.07, 0.26)</b> | <b>1.72 (1.35, 2.20)</b> |
| High                           | <b>0.19 (0.08, 0.30)</b> | <b>2.05 (1.49, 2.81)</b> |
| B. Social functioning problems |                          |                          |
| Age                            |                          |                          |
| 12–18                          | –0.09 (–0.27, 0.10)      | 0.69 (0.26, 1.83)        |
| 19–39                          | 0.05 (–0.03, 0.13)       | 1.18 (0.90, 1.53)        |
| 40–59                          | 0.05 (–0.04, 0.13)       | 1.17 (0.88, 1.53)        |
| 60+                            | 0.01 (–0.13, 0.15)       | 1.07 (0.56, 2.04)        |
| Sex                            |                          |                          |
| Male                           | 0.04 (–0.03, 0.11)       | 1.20 (0.88, 1.62)        |
| Female                         | 0.05 (–0.05, 0.14)       | 1.14 (0.89, 1.45)        |
| Race                           |                          |                          |
| White                          | 0.00 (–0.06, 0.06)       | 0.99 (0.78, 1.26)        |
| Black                          | 0.12 (–0.02, 0.27)       | 1.45 (1.00, 2.10)        |
| SES                            |                          |                          |
| Low                            | <b>0.09 (0.00, 0.18)</b> | <b>1.33 (1.04, 1.70)</b> |
| Medium                         | –0.01 (–0.10, 0.08)      | 0.96 (0.69, 1.35)        |
| High                           | 0.04 (–0.07, 0.14)       | 1.16 (0.77, 1.75)        |

Bolded text indicates statistical significant at  $P < .05$ .

\* PSU and strata variables were included in analyses as covariates. Analyses were on a single imputed data set.

**Table S5**

Survey weights: \* risk differences (RD) and ratios (RR) for severe distress and social functioning problems associated with firearm involvement during a violent victimization

| A. Severe distress             |                          |                          |
|--------------------------------|--------------------------|--------------------------|
|                                | PD (95% CI)              | PR (95% CI)              |
| Age                            |                          |                          |
| 12–18                          | 0.04 (–0.11, 0.19)       | 1.26 (0.55, 2.91)        |
| 19–39                          | <b>0.18 (0.11, 0.26)</b> | <b>1.80 (1.48, 2.19)</b> |
| 40–59                          | <b>0.18 (0.09, 0.27)</b> | <b>1.56 (1.29, 1.87)</b> |
| 60+                            | 0.01 (–0.15, 0.16)       | 1.02 (0.63, 1.67)        |
| Sex                            |                          |                          |
| Male                           | <b>0.12 (0.05, 0.19)</b> | <b>1.80 (1.38, 2.34)</b> |
| Female                         | <b>0.19 (0.10, 0.28)</b> | <b>1.56 (1.31, 1.86)</b> |
| Race                           |                          |                          |
| White                          | <b>0.15 (0.08, 0.21)</b> | <b>1.64 (1.38, 1.94)</b> |
| Black                          | <b>0.18 (0.06, 0.30)</b> | <b>1.63 (1.25, 2.13)</b> |
| SES                            |                          |                          |
| Low                            | <b>0.14 (0.05, 0.23)</b> | <b>1.44 (1.17, 1.77)</b> |
| Medium                         | <b>0.16 (0.07, 0.25)</b> | <b>1.69 (1.33, 2.15)</b> |
| High                           | <b>0.17 (0.07, 0.27)</b> | <b>1.95 (1.45, 2.63)</b> |
| B. Social functioning problems |                          |                          |
| Age                            |                          |                          |
| 12–18                          | –0.10 (–0.26, 0.07)      | 0.65 (0.26, 1.62)        |
| 19–39                          | 0.04 (–0.04, 0.12)       | 1.15 (0.90, 1.49)        |
| 40–59                          | 0.04 (–0.05, 0.12)       | 1.13 (0.86, 1.50)        |
| 60+                            | 0.02 (–0.14, 0.18)       | 1.09 (0.53, 2.24)        |
| Sex                            |                          |                          |
| Male                           | 0.03 (–0.04, 0.09)       | 1.13 (0.83, 1.54)        |
| Female                         | 0.05 (–0.04, 0.14)       | 1.14 (0.90, 1.44)        |
| Race                           |                          |                          |
| White                          | 0.00 (–0.06, 0.06)       | 1.01 (0.80, 1.26)        |
| Black                          | 0.11 (–0.02, 0.23)       | 1.38 (0.98, 1.93)        |
| SES                            |                          |                          |
| Low                            | 0.08 (–0.01, 0.16)       | <b>1.27 (1.00, 1.62)</b> |
| Medium                         | –0.01 (–0.10, 0.07)      | 0.95 (0.69, 1.30)        |
| High                           | 0.04 (–0.06, 0.14)       | 1.18 (0.81, 1.71)        |

Bolded text indicates statistical significant at  $P < .05$ .

\* Five observations with weights greater than 6000 were excluded from the analysis. Analyses were on a single imputed data set.

**Table S6**

Description of study sample, stratified by outcome missingness

|                   | Not missing outcome,<br>N (weighted %) | Missing outcome,<br>N (weighted %) |
|-------------------|----------------------------------------|------------------------------------|
| Sample size       | 5698 (100)                             | 1421 (100)                         |
| Gun victimization | 530 (9.17)                             | 185 (13.36)                        |
| Severe distress   | 1536 (26.13)                           | —                                  |
| Social problems   | 1568 (27.24)                           | —                                  |
| Age 12–18         | 952 (20.16)                            | 277 (22.56)                        |
| Age 19–39         | 2551 (46.85)                           | 605 (45.34)                        |
| Age 40–59         | 1732 (26.62)                           | 422 (25.61)                        |
| Age 60+           | 463 (6.36)                             | 117 (6.49)                         |
| Male              | 2841 (51.72)                           | 733 (53.21)                        |
| Female            | 2857 (48.28)                           | 688 (46.79)                        |
| White             | 4512 (77.15)                           | 1094 (74.31)                       |
| Black             | 768 (15.52)                            | 235 (19.17)                        |
| Other race        | 418 (7.34)                             | 92 (6.52)                          |
| Low SES           | 1936 (33.69)                           | 437 (31.69)                        |
| Medium SES        | 1880 (33.52)                           | 493 (34.80)                        |
| High SES          | 1882 (32.80)                           | 491 (33.51)                        |

SES values may differ from Tables 1 and 2 because of the use of imputed data rather than complete case data to perform the PCA.
